# Supplementary material for: Short-term interval aerobic exercise training does not improve memory functioning in relapsing-remitting multiple sclerosis—a randomized controlled trial
Source: PeerJ. 2018 Dec 12;6:e6037. doi: 10.7717/peerj.6037 (PMC6295157; doi:10.7717/peerj.6037)
Supplement: Supplemental Information 1 [file peerj-06-6037-s001.xlsx]

## Sheet: Tabelle1
Patient_Number	group(1=control_group;2=intervention_group)	ITT(0=not_included;1=included)	PP(0=not_included;1=included)	Responder(0=not_included;1=included)	year_of_birth	age(years)	sex(1=male;2=female)	education(years)	edss_baseline	disease_duration_symptoms(years)	disease_duration_diagnosis(years)	immunotherapy(0=no;1=yes)	number_of_sessions(training)	VLMT_1-5_0W	VLMT_5-7_0W	SDMT_0W(points)	BVMT_R_total_learning_0W(points)	BVMT_R_recall_0W(points)	BVMT_R_recognitionhits_0W(points)	BVMT_R_false_alarms_0W(points)	TAP_tonic_alertness_0W(msec)	TAP_phasic_alertness_0W(msec)	TAP_CSA_valid_0W(msec)	TAP_CSA_invalid_0W(msec)	TAP_incompatibility_0W(msec)	RWT_verbalfluency_I_0W(points)	RWT_verbalfluency_II_0W(points)	RWT_verbalflexibility_0W(points)	PASAT_0W(points)	Corsi_forwards_0W(points)	Corsi_backwards_0W(points)	MASC_0W	6MWT_0W(m)	9HPT_dominant_0W(sec)	9HPT_non_dominant_0W(sec)	T25FW_0W(sec)	VO2PEAK_0W(ml_O2/min)	VO2PEAK/KG_0W(ml_O2/min/kg)	PMAX_0W(watt)	IDS_16SR_0W	FSMC_0W	MSWS_12_0W	HAQUAMS_0W	VLMT_1-5_3M	VLMT_5-7_3M	SDMT_3M(points)	BVMT_R_total_learning_3M(points)	BVMT_R_recall_3M(points)	BVMT_R_recognitionhits_3M(points)
100	1	1	1	0	1967	46	1	13	0	1	1	0	29	66	0	47	30	12	6	0	243	231	253	233	392	20	44	22	56	11	10	9	592	17.205	18.3425	3.59	2030	28.96	166	0	20	12	41	67	1	47	22	10	6
101	2	1	1	0	1988	25	1	13	1.5	3	2	0	21	67	0	59	30	11	6	0	194	207	284	275	392	24	37	27	53	13	11	14	322	17.24	19.28	3.48	3480	49.22	263	9	46	12	48	65	2	58	26	11	6
103	2	1	1	1	1969	44	2	10	3	23	23	1	18	51	1	29	18	9	5	0	245	288	289	323	466	19	36	19	45	4	5	9	360	16.915	17.6825	5.54	1250	22.56	92	4	64	43	59	53	-1	44	21	11	5
104	2	1	1	0	1977	36	2	13	1.5	13	13	1	23	44	0	49	22	7	6	0	232	222	306	311	538	20	38	28	50	6	7	10	464	19.685	18.8775	4.12	2710	25.71	185	7	79	26	83	59	4	44	23	9	6
105	2	1	1	1	1950	63	1	9	3	3	3	0	32	37	2	36	9	4	6	0	248	251	321	402	496	25	26	17	34	12	10	10	523	20.52	19.1	4.24	1980	22.25	149	4	37	13	45	39	5	43	12	6	5
106	2	1	0	0	1954	59	2	9	2	8	6	0	13	39	2	52	18	6	6	0	235	231	358	428	486	15	34	24	50	8	8	9	476	19.4913	19.4913	6.01	1600	20.08	113	10	80	34	67	58	12	53	26	11	6
107	2	1	0	0	1971	42	1	13	3.5	15	12	0	4	56	0	53	22	11	6	0	237	242	400	444	509	35	59	30	48	8	9	10	300	30.37	26.235	6.4	1950	13.83	140	13	81	40	92	-999	-999	-999	-999	-999	-999
108	2	1	1	0	1977	36	2	13	0	1	1	0	27	68	4	75	22	10	5	0	259	256	317	355	523	30	40	28	60	13	10	14	540	19.74	20.11	4.63	1760	28.85	153	8	41	13	40	61	4	73	25	8	6
109	1	1	1	0	1982	31	2	13	3.5	22	21	1	25	52	1	60	17	9	6	0	228	242	329	428	456	38	34	17	41	11	9	13	410	22.38	24.235	5.62	1540	20	109	5	69	20	54	54	4	60	22	9	5
111	1	1	1	0	1983	30	1	10	-999	5	5	1	5	34	1	54	25	11	6	0	208	217	260	326	449	23	34	19	57	10	8	13	610	18.95	18.495	3.53	2790	29.68	202	3	67	14	50	54	2	59	29	11	6
112	1	1	1	0	1966	48	1	13	3.5	16	16	1	0	46	2	56	22	7	6	0	300	280	349	397	437	18	23	21	38	10	9	10	440	22.235	37.4225	4.92	2110	26.02	-999	3	58	45	61	52	2	56	24	8	6
113	2	1	1	0	1984	29	1	13	0	3	3	1	36	61	3	61	23	11	6	0	209	219	248	262	460	40	42	23	51	10	7	13	700	16.77	17.33	3.23	2640	34.6	218	3	37	12	45	71	-1	61	27	12	6
114	1	1	1	0	1955	58	2	13	3	22	14	0	0	56	-1	54	20	10	6	0	344	319	358	378	638	17	32	25	47	7	6	11	375	27.2	22.89	6.29	1420	-999	111	4	70	24	61	-999	-999	-999	-999	-999	-999
115	1	1	1	0	1975	38	2	13	0	2	2	0	6	64	1	69	24	8	6	0	207	212	241	271	402	42	63	30	56	5	4	13	540	17	17.265	3.84	1890	30	165	7	66	13	62	67	1	70	28	11	6
116	1	1	1	0	1968	46	2	10	3.5	24	2	0	7	63	4	46	28	10	6	0	281	276	330	416	457	21	39	18	32	8	9	14	440	25.805	26.8225	6.17	1110	18.2	68	14	80	53	84	61	3	46	21	8	6
117	1	1	1	0	1970	43	2	13	2	15	15	1	29	55	3	58	24	8	6	0	262	251	286	335	461	19	28	21	41	7	8	12	440	17.545	16.9725	4.45	1600	18.52	156	4	29	14	32	57	1	56	16	7	6
118	2	1	1	0	1963	50	1	13	1.5	5	5	1	22	54	1	59	17	4	6	0	238	243	229	243	464	27	38	16	53	9	10	12	544	17.605	19.1625	4.06	2060	26.11	166	6	65	12	45	63	0	59	13	7	6
119	2	1	1	1	1982	31	1	13	0	3	3	1	21	57	3	61	24	11	6	0	219	213	235	281	521	17	32	17	39	8	7	10	509	20.01	18.37	4.43	2870	30.86	208	2	30	12	41	48	1	57	13	10	6
120	1	1	1	0	1968	45	2	10	3.5	7	7	1	26	67	-1	69	28	10	6	0	253	247	287	372	533	43	45	17	58	9	9	12	440	21.63	20.415	5.5	1260	26.25	110	10	62	50	66	60	0	78	28	11	6
121	2	1	1	1	1983	30	2	13	1	4	4	1	33	68	0	57	31	12	6	0	378	395	447	494	640	14	33	20	50	12	11	12	464	19.46	20.43	4.37	1990	26.46	176	6	59	14	43	68	0	61	33	12	6
122	2	1	1	0	1973	41	2	13	1.5	17	17	1	27	62	2	53	24	8	5	0	327	281	350	413	487	28	38	24	43	8	10	9	430	23.91	22.905	5.73	1690	28.17	131	8	35	15	58	63	-1	52	24	10	6
123	2	1	1	0	1984	29	2	13	2	2	1	1	18	64	1	76	31	10	6	0	269	298	273	304	402	25	36	22	58	10	11	12	390	17.16	17.24	5.26	1560	27.86	132	5	65	17	62	67	0	77	26	11	6
124	1	1	1	0	1976	37	2	13	1.5	1	1	0	18	56	2	54	11	4	4	1	209	206	276	336	546	25	41	22	53	10	6	13	487	18.635	18.4475	5.23	1610	32.86	140	10	72	13	73	59	1	53	26	8	6
125	1	1	1	0	1990	23	2	13	1	2	2	0	17	64	0	62	30	12	6	0	243	249	274	272	587	13	29	19	55	9	9	12	384	15.98	17.105	4.24	1690	26	126	12	70	13	68	70	0	63	26	10	6
126	1	1	1	0	1977	36	1	13	1	21	18	1	0	75	0	54	32	10	6	0	301	281	311	330	421	21	43	21	60	10	8	12	500	18.48	17.62	4.43	2010	30.45	156	7	78	20	65	-999	-999	-999	-999	-999	-999
127	2	1	1	0	1985	28	2	13	3	12	12	1	26	72	0	65	24	10	6	0	225	246	287	390	456	26	38	25	52	10	10	12	427	19.6	22.96	4.65	1310	28.73	102	2	55	14	45	72	0	65	23	7	6
129	2	1	1	0	1964	49	2	13	2.5	14	7	1	19	61	0	52	29	9	6	0	218	221	240	298	524	24	43	25	56	8	8	12	363	19.375	18.8875	3.98	1420	28.46	128	8	90	24	73	61	1	50	25	9	5
130	2	1	1	1	1975	39	2	13	1	2	2	1	20	73	0	71	30	11	6	0	340	320	341	399	535	40	66	34	44	6	6	12	495	17.585	18.0575	3.7	2010	32.52	168	0	24	12	44	57	1	90	30	10	6
131	2	1	0	0	1970	44	2	10	2	5	3	1	13	61	-1	50	31	11	6	0	257	257	340	357	461	22	37	16	31	8	8	13	446	20.94	21.49	4.96	1890	16.73	141	11	85	23	68	70	0	48	25	9	5
133	1	1	1	0	1966	48	2	13	2.5	14	14	0	24	56	0	52	25	9	6	1	249	270	381	463	704	22	31	13	41	8	10	14	450	22.83	22.255	4.95	1550	22.59	137	5	86	25	69	63	-1	53	25	9	6
134	1	1	1	0	1980	34	2	13	1	12	0	0	13	60	-1	62	30	12	6	0	280	290	322	417	571	20	22	19	59	6	9	10	500	20.045	22.5975	4.73	2340	32.68	201	2	31	12	35	58	1	58	19	7	6
135	1	1	1	0	1981	32	1	13	1	15	0	0	21	63	1	76	27	11	6	0	206	208	234	243	346	30	36	28	56	12	10	12	515	18.975	18.1325	3.46	1990	25.51	173	3	40	13	35	67	0	89	34	11	6
136	2	1	0	0	1990	25	2	13	1	1	1	1	15	62	0	63	29	11	5	0	235	236	284	315	435	21	36	27	45	10	6	10	500	16.865	17.0625	4.54	1460	22.12	123	3	24	12	36	58	0	64	31	8	6
137	1	1	1	0	1973	41	2	13	1.5	14	14	0	20	63	1	61	30	12	6	0	273	262	315	362	510	30	56	30	59	11	11	13	530	22.105	23.9275	4.26	1150	21.7	112	3	34	16	35	69	0	66	32	12	6
138	1	1	1	0	1986	28	2	9	2.5	8	5	1	0	48	0	61	23	8	6	0	292	245	308	342	475	17	24	18	49	8	6	9	450	23.145	23.1025	5.45	1270	14.17	112	17	71	22	68	-999	-999	-999	-999	-999	-999
140	1	1	1	0	1972	42	1	10	1.5	1	1	1	0	52	-1	61	29	11	6	0	258	239	271	323	418	20	34	23	54	12	11	8	500	17.61	18.755	3.87	2490	30.67	170	12	49	16	53	54	0	67	29	10	6
141	1	1	1	0	1966	48	2	10	3	25	8	0	14	62	0	60	32	11	6	0	347	323	411	457	516	25	53	25	55	7	10	12	406	18.725	17.8075	4.68	1270	24.42	104	13	90	31	94	69	1	66	26	10	6
142	2	1	1	1	1974	40	1	13	1	2	1	1	35	59	1	61	28	11	6	0	232	232	250	298	475	40	50	29	52	12	11	11	321	17.8975	17.8975	3.91	3180	37.46	201	17	63	12	59	64	0	65	24	11	6
143	1	1	1	0	1980	34	2	9	0	7	7	1	10	64	3	35	22	11	6	0	243	266	307	354	579	14	22	16	43	8	8	9	380	21.51	19.72	5.21	1490	21.23	101	2	25	12	32	60	4	42	21	10	6
144	1	1	1	0	1982	32	2	13	2	10	7	0	17	65	0	63	30	11	6	0	207	199	224	261	383	38	43	29	59	11	9	15	320	15.13	16.315	3.67	1860	28.18	140	3	25	17	32	60	2	74	30	12	6
145	1	1	1	0	1986	28	2	13	1.5	2	2	1	23	72	0	65	34	12	6	0	221	236	258	311	421	32	46	24	55	10	6	14	280	19.0525	21.205	4.59	1890	33.75	150	3	28	13	32	72	0	72	28	11	6
146	1	1	1	0	1967	47	2	13	3	2	1	0	24	56	3	41	28	11	6	0	316	307	312	314	541	31	33	20	50	8	10	11	220	17.255	18.5375	5.5	1340	17.82	122	0	21	14	31	58	1	51	28	10	6
147	1	1	1	0	1966	49	2	13	2	11	3	1	18	66	1	76	36	12	6	0	257	247	275	307	414	25	44	27	52	9	11	10	466	16.7	16.565	3.96	1460	20.45	111	9	61	15	45	65	2	83	36	12	6
148	2	1	1	0	1967	47	1	13	2	14	14	1	21	47	0	63	29	9	6	0	236	260	306	334	532	21	44	25	60	10	9	11	470	16.81	18.005	5.18	2710	39.39	217	2	22	13	44	-999	-999	-999	-999	-999	-999
149	1	1	1	0	1985	29	2	13	2	1	0	1	0	66	0	62	36	11	6	0	243	237	275	340	458	25	37	23	46	9	10	14	500	17.13	18.22	3.75	2350	33.1	185	10	65	13	68	58	0	65	32	11	6
150	1	1	1	0	1957	58	2	13	2	3	2	0	14	53	3	52	24	10	6	0	248	241	337	374	538	22	26	16	46	6	8	7	455	16.53	17.36	5.81	1630	28.6	134	6	33	13	0	46	5	49	25	11	6
151	1	1	1	0	1978	37	2	13	1.5	3	1	0	15	56	3	64	34	11	6	0	342	256	324	343	532	16	30	24	46	9	9	7	480	17.215	17.2775	4.37	1770	20.68	141	3	35	12	49	69	0	58	30	11	6
152	2	1	1	1	1983	32	2	13	1.5	12	8	0	31	66	0	73	29	12	6	0	247	239	289	360	434	29	22	22	53	10	10	13	240	14.825	16.4425	4.22	1930	19.53	161	7	64	12	54	69	1	75	29	11	6
153	2	1	1	0	1956	59	1	13	3	9	9	0	22	56	1	54	23	10	6	0	235	238	285	324	524	19	21	13	57	9	7	13	210	26	26	6	2440	26.96	192	3	64	19	38	64	2	62	22	11	6
154	2	1	0	0	1988	26	1	13	1.5	8	6	0	10	63	0	72	28	11	6	0	250	217	257	269	453	37	44	28	59	9	11	12	467	14.655	14.6525	3.9	3330	37.67	230	3	27	12	30	64	1	66	30	11	6
155	2	1	1	1	1983	31	2	13	1	1	1	1	33	56	0	65	29	11	6	0	203	210	244	297	392	14	31	20	29	6	7	14	482	19.44	19.03	5.06	2600	21.79	191	3	26	12	39	63	1	46	26	11	6
157	2	1	1	1	1983	31	2	13	1	3	3	0	27	56	-1	75	34	12	6	0	211	222	245	281	356	13	40	23	54	10	6	11	240	15	16	3	2520	32.18	110	1	33	12	38	61	-1	78	29	11	6
159	2	1	1	0	1975	39	2	13	1.5	11	11	1	26	61	0	61	21	9	4	0	242	244	321	348	593	20	25	22	40	9	8	9	485	20.185	19.2125	4.53	1590	19.53	128	4	35	19	41	66	0	63	19	9	6
160	2	1	1	1	1972	42	1	13	1	1	0	1	21	72	3	85	29	10	6	0	234	268	284	296	495	23	37	27	59	10	11	13	603	19.58	20.15	4.87	3460	37.61	230	0	32	13	42	73	1	88	29	12	6
161	2	1	0	1	1978	37	1	10	1.5	10	0	1	16	38	3	46	29	10	6	0	282	262	320	346	455	15	19	18	36	8	7	12	500	20.29	20.68	3.84	2780	30.72	179	5	33	14	45	41	4	43	30	11	6
162	2	1	0	0	1975	36	2	13	2.5	14	13	0	0	62	1	42	22	10	6	0	265	258	335	377	541	18	37	24	29	4	7	12	354	22.6525	22.6526	4.84	1420	22.87	87	3	36	36	47	-999	-999	-999	-999	-999	-999
163	2	1	0	0	1977	38	2	13	1.5	10	10	1	0	63	0	68	30	11	6	1	220	214	262	306	401	15	36	26	50	7	10	11	474	18.58	18.195	4.92	1450	14.31	110	9	61	15	64	-999	-999	-999	-999	-999	-999
164	2	1	0	0	1980	35	1	13	1	12	8	1	11	59	2	59	31	11	6	0	279	385	307	368	523	25	51	30	51	10	9	14	450	17.265	17.7775	4.07	2820	33.57	212	3	23	13	32	66	4	58	33	12	6
165	1	1	1	0	1967	47	2	9	1.5	8	1	1	20	57	3	56	23	10	6	1	192	219	308	393	558	32	42	31	57	10	10	15	504	16.47	16.11	4.29	1870	27.91	141	6	79	15	52	63	2	62	18	8	6
166	2	1	0	0	1983	32	2	10	2.5	16	13	1	0	62	-2	38	16	9	6	0	294	289	454	487	604	9	19	14	12	7	5	3	323	31.05	28.295	5.92	1130	20.7	94	16	94	41	87	-999	-999	-999	-999	-999	-999
168	1	1	1	0	1995	20	1	13	1.5	0	0	0	7	66	-1	72	31	12	6	0	222	226	276	333	462	23	31	17	53	10	11	13	360	17.93	18.675	3.73	1890	23.33	142	9	32	12	42	62	2	71	32	11	6
170	1	1	1	0	1982	33	2	13	2.5	13	3	0	0	64	1	57	29	12	6	0	271	258	330	392	449	20	42	23	32	7	7	14	495	15.61	16.67	3.86	-999	-999	-999	7	81	18	64	63	0	56	30	11	6
171	1	1	1	0	1965	50	1	13	2	16	16	0	6	54	6	45	9	4	6	0	219	215	307	413	465	26	35	21	56	7	3	9	465	18.785	19.4825	5.1	1950	26.42	152	1	26	12	0	55	5	48	14	2	3
172	2	1	1	0	1978	37	2	13	2.5	8	8	0	10	61	-1	55	29	11	6	0	202	206	282	293	506	24	32	24	41	11	9	13	465	17.745	18.7075	4.18	2210	30.69	164	8	72	25	59	57	2	54	32	10	6
173	1	1	1	0	1959	56	2	13	1	2	1	0	5	44	1	54	27	10	6	0	329	417	393	414	499	21	28	18	25	7	7	8	426	20.03	20.64	4.93	1220	17.43	102	9	61	18	42	43	-1	46	18	11	6
174	1	1	1	0	1982	32	2	13	1	3	0	1	22	65	-1	63	29	9	6	0	275	320	255	290	441	22	38	22	49	12	9	11	420	18.38	19.05	3.8	1790	28.41	137	1	47	12	42	70	0	66	30	11	6
175	2	1	0	0	1981	36	2	9	3	10	7	1	11	59	2	64	35	12	6	0	304	297	340	378	552	19	38	28	45	10	9	8	353	18.3	18.795	4.65	1950	15.23	159	23	70	43	92	63	0	58	34	12	6
176	1	1	1	0	1976	39	1	10	1	2	2	1	13	60	1	56	20	10	6	0	243	244	277	306	534	15	36	19	57	6	9	14	480	14.7675	15.285	4.06	2500	34.72	187	5	55	12	52	56	-1	57	31	11	6
[truncated: 24 more columns]
